# Supplementary material for: PD-1 mRNA expression in peripheral blood cells and its modulation characteristics in cancer patients
Source: PubMed Central journal article supplement (PMC5584204; doi:10.18632/oncotarget.15006), 2017-02-02
Supplement: oncotarget-08-50782-s001.pdf [file oncotarget-08-50782-s001.pdf]

## PD-1 mRNA expression in peripheral blood cells and its modulation characteristics in cancer patients

### SUPPLEMENTARY TABLES

**Supplementary Table 1: Gene expression levels in peripheral blood of normal adults**

| NO. | Relative gene expression                                |          |          |          |          |              |          |
|-----|---------------------------------------------------------|----------|----------|----------|----------|--------------|----------|
|     | [Absolute quantitative (target gene/housekeeping gene)] |          |          |          |          |              |          |
|     | CD25                                                    | CD28     | CTLA-4   | PD-1     | Foxp3    | TGF- $\beta$ | IL-10    |
| #1  | 3.14E-04                                                | 6.69E-04 | 9.82E-04 | 6.03E-04 | 2.31E-02 | 7.08E-02     | 6.98E-02 |
| #2  | 4.96E-04                                                | 6.90E-04 | 1.19E-03 | 9.86E-04 | 8.98E-03 | 6.60E-02     | 6.17E-02 |
| #3  | 2.78E-04                                                | 6.12E-04 | 6.94E-04 | 3.45E-04 | 1.49E-03 | 7.83E-02     | 1.05E-01 |
| #4  | 3.94E-04                                                | 5.72E-04 | 1.26E-03 | 4.31E-04 | 1.10E-03 | 8.72E-02     | 7.67E-02 |
| #5  | 5.51E-04                                                | 5.82E-04 | 1.01E-03 | 2.59E-04 | 1.02E-03 | 7.51E-02     | 5.71E-02 |
| #6  | 2.42E-04                                                | 5.59E-04 | 8.57E-04 | 2.02E-04 | 9.19E-04 | 1.07E-01     | 9.55E-02 |
| #7  | 3.32E-03                                                | 2.02E-03 | 2.76E-03 | 1.26E-03 | 3.65E-03 | 9.78E-02     | 8.21E-02 |
| #8  | 1.03E-03                                                | 8.00E-04 | 1.72E-03 | 3.08E-04 | 2.88E-03 | 6.74E-02     | 7.97E-02 |
| #9  | 2.84E-03                                                | 7.86E-04 | 1.66E-03 | 3.04E-04 | 2.64E-03 | 6.24E-02     | 8.03E-02 |
| #10 | 1.41E-04                                                | 2.64E-04 | 4.69E-04 | 5.99E-04 | 1.51E-03 | 6.03E-02     | 7.32E-02 |

**Supplementary Table 2: Gene expression levels in peripheral blood of malignant patients**

See Supplementary File 1

**Supplementary Table 3: The proportion of T, NK, B, Treg, CD3<sup>+</sup>CD8<sup>+</sup>CD28<sup>+</sup> and CD3<sup>+</sup>CD8<sup>+</sup>CD28<sup>-</sup> subpopulations in peripheral blood of malignant patients**

[T cells: CD3<sup>+</sup>CD19<sup>-</sup>; B cells: CD3<sup>+</sup>CD19<sup>+</sup>; NK cells: CD3<sup>+</sup>CD16<sup>+</sup>56<sup>+</sup>; Treg cells: CD4<sup>+</sup>CD25<sup>+</sup>CD127<sup>low</sup>; suppressor T cells (Ts): CD3<sup>+</sup>CD8<sup>+</sup>CD28<sup>-</sup>; cytotoxic T cells (CTL): CD3<sup>+</sup>CD8<sup>+</sup>CD28<sup>+</sup>.]

See Supplementary File 1
